# Supplementary material for: Structures, physicochemical properties, and applications of T–HgII–T, C–AgI–C, and other metallo-base-pairs
Source: Royal Society of Chemistry journal article supplement (doi:10.1039/c5cc02693h), 2015-01-01
Supplement: c5cc02693h1.pdf [file c5cc02693h1.pdf]

## Electronic Supplementary Information (ESI)

### Structures, physicochemical properties, and applications of T–Hg<sup>II</sup>–T, C–Ag<sup>I</sup>–C, and other metallo-base-pairs†

Yoshiyuki Tanaka,<sup>\*a,b</sup> Jiro Kondo,<sup>c</sup> Vladimír Sychrovský,<sup>d</sup> Jakub Šebera,<sup>d,e</sup> Takenori Dairaku,<sup>b</sup> Hisao Saneyoshi,<sup>f</sup> Hidehito Urata,<sup>g</sup> Hidetaka Torigoe<sup>h</sup> and Akira Ono<sup>\*f</sup>

<sup>a</sup> Faculty of Pharmaceutical Sciences, Tokushima Bunri University, 180 Nishihama-Boji, Yamashirocho, Tokushima, Tokushima 980-8578, Japan. E-mail: tanakay@ph.bunri-u.ac.jp

<sup>b</sup> Graduate School of Pharmaceutical Sciences, Tohoku University, 6-3 Aza-Aoba, Aramaki, Aoba-ku, Sendai, Miyagi 980-8578, Japan.

<sup>c</sup> Department of Materials and Life Sciences, Faculty of Science and Technology, Sophia University 7-1 Kioi-cho, Chiyoda-ku, Tokyo 102-8554, Japan

<sup>d</sup> Institute of Organic Chemistry and Biochemistry, Academy of Sciences of the Czech Republic, v.v.i., Flemingovo náměstí 2, 16610, Praha 6, Czech Republic

<sup>e</sup> Institute of Physics, Academy of Sciences of the Czech Republic, v.v.i, Na Slovance 2, CZ-182 21 Prague 8, Czech Republic

<sup>f</sup> Department of Material & Life Chemistry, Kanagawa University, 3-27-1 Rokkakubashi, Kanagawa-ku, Yokohama, Kanagawa 221-8686, Japan. E-mail: akiraono@kanagawa-u.ac.jp

<sup>g</sup> Osaka University of Pharmaceutical Sciences, 4-20-1 Nasahara, Takatsuki, Osaka 569-1094, Japan

<sup>h</sup> Department of Applied Chemistry, Faculty of Science, Tokyo University of Science, 1-3 Kagurazaka, Shinjuku-ku, Tokyo 162-8601, Japan

Metallo-base pairs in duplexes are compiled and classified according to several factors, metal ions, strand orientation, etc. (Same metallo-base pairs appear in several sections.)

|                                         |       |
|-----------------------------------------|-------|
| Ag(I)                                   | 2-9   |
| Cu(II)                                  | 10-14 |
| Hg(II)                                  | 15-18 |
| Other metal ions                        | 18-20 |
| Metallo-base-pairs in parallel duplexes | 21-22 |

## Electronic Supplementary Information (ESI)

Metallo-base-pairs containing plural metal ions

22-24

## Electronic Supplementary Information (ESI)

Ag(I)-----

### Pyrimidine bases

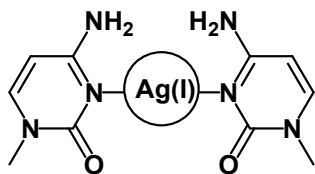

Akira Ono, Shiqi Cao, Humika Togashi, Mitsuru Tashiro, Takashi Fujimoto, Tomoya Machinami, Shuji Oda, Yoko Miyake, Itaru Okamoto, and Yoshiyuki Tanaka

“Specific interactions between Silver(I) Ions and Cytosine–Cytosine Pairs in DNA Duplexes”

*Chem. Commun.*, **2008**, 4825-4827..

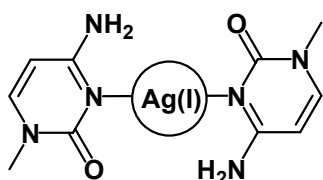

T. Ono, K. Yoshida, Y. Saotome, R. Sakabe, I. Okamoto, A. Ono

“Synthesis of covalently linked parallel and antiparallel DNA duplexes containing the metal-mediated base pairs T-Hg(II)-T and C-Ag(I)-C” *Chem. Commun.*, **2011**, 47, 1542-1544.

D. A. Megger and J. Müller

Silver(I)-Mediated Cytosine Self-Pairing is Preferred Over Hoogsteen-Type Base Pairs with the Artificial Nucleobase 1,3-Dideaza-6-Nitropurine

*Nucleosides, Nucleotides Nucleic Acids*, **2010**, 29, 27–38;

## Electronic Supplementary Information (ESI)

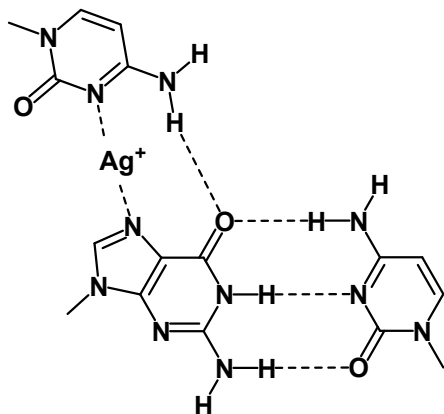

Toshihiro Ihara, Tatsuaki Ishii, Norie Araki, Anthony W. Wilson, and Akinori Jyo  
Silver Ion Unusually Stabilizes the Structure of a Parallel-Motif DNA Triplex  
*J. Am. Chem. Soc.*, **2009**, *131*, 3826–3827

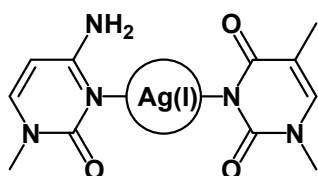

Hidehito Urata, Eriko Yamaguchi, Yasunari Nakamura and Shun-ichi Wada  
Pyrimidine–pyrimidine base pairs stabilized by silver(I) ions  
*Chem. Commun.*, **2011**, *47*, 941–943

Tatsuya Funai, Junko Nakamura, Yuki Miyazaki, Risa Kiri, Osamu Nakagawa, Shun-ichi Wada, Akira Ono, and Hidehito Urata  
“Regulated Incorporation of Two Different Metal Ions into Programmed Sites in a Duplex by DNA Polymerase Catalyzed Primer Extension”  
*Angew. Chem. Int. Ed.*, **2014**, *53*, 6624–6627

## Electronic Supplementary Information (ESI)

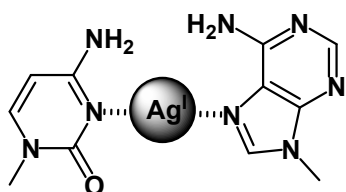

Tatsuya Funai, Yuki Miyazaki, Megumi Aotani, Eriko Yamaguchi, Osamu Nakagawa, Shun-ichi, Wada, Hidetaka Torigoe, Akira Ono, and Hidehito Urata

Ag<sup>I</sup> Ion Mediated Formation of a C–A Mismatch by DNA Polymerases

*Angew. Chem. Int. Ed.* **2012**, *51*, 6464–6466

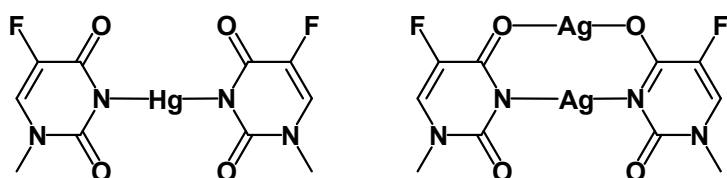

Itaru Okamoto, Kenji Iwamoto, Yuko Watanabe, Yoko Miyake, Akira Ono

“Switching Metal Ion Binding Selectivity of Chemically Modified Uracil Pairs in DNA Duplexes Triggered by pH Change”

*Angew. Chem. Int. Ed.*, **2009**, *48*, 1658-1651.

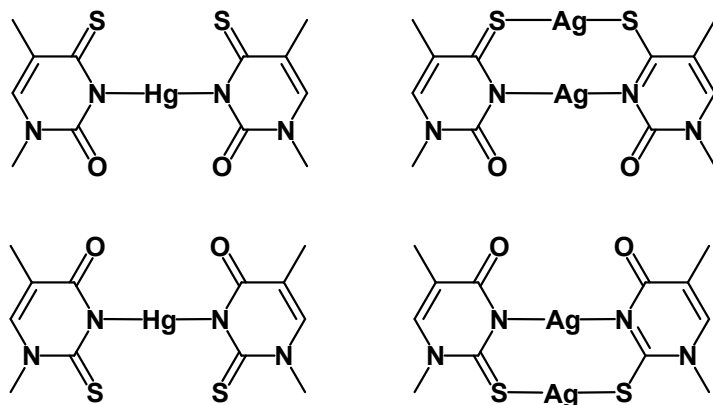

Itaru Okamoto, Takashi Ono, Rimi Sameshima and Akira Ono

“Metal ion-binding properties of DNA duplexes containing thiopyrimidine base pairs”

*Chem. Commun.*, **2012**, *48*, 4347-4349.

# Electronic Supplementary Information (ESI)

## Synthetic bases

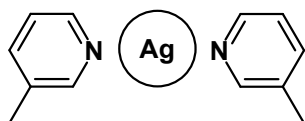

Tanaka, K.; Yamada, Y.; Shionoya, M.

Formation of silver(I)-mediated DNA duplex and triplex through an alternative base pair of pyridine nucleobases.

*J. Am. Chem. Soc.*, **2002**, *124*, 8802–8803.

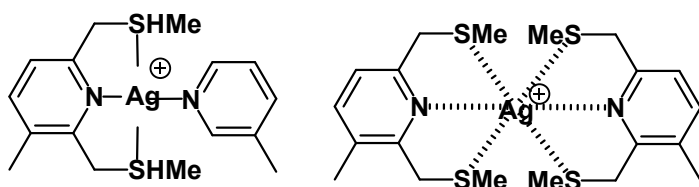

Zimmermann, N.; Meggers, E.; Schultz, P. G.

A novel silver(I)-mediated DNA base pair.

*J. Am. Chem. Soc.* **2002**, *124*, 13684–13685.

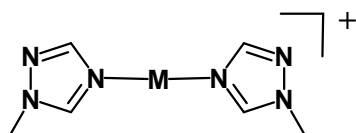

Dominik Böhme, Nicole Dupre, Dominik A. Megger, and Jens Müller

Conformational Change Induced by Metal-Ion-Binding to DNA Containing the Artificial 1,2,4-Triazole Nucleoside

*Inorg. Chem.*, **2007**, *46*, 10114-10119.

## Electronic Supplementary Information (ESI)

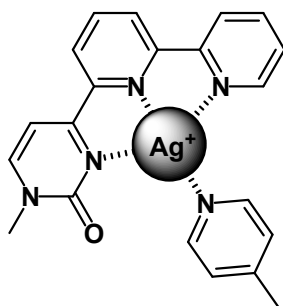

Shin, D. W.; Switzer, C.

A metallo base-pair incorporating a terpyridyl-like motif: bipyridylpyrimidinone- Ag(I) 3 4-pyridine.

*Chem. Commun.* **2007**, 4401–4403.

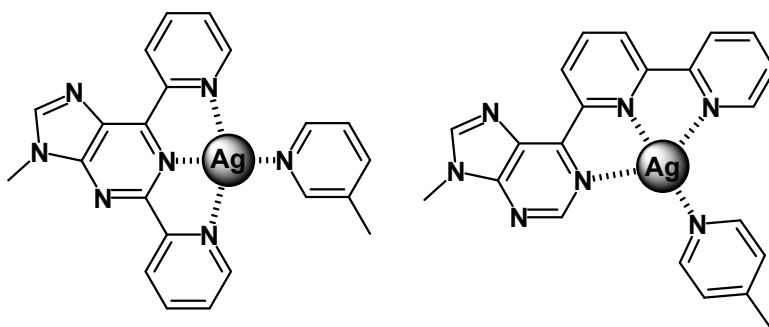

Heuberger, B. D.; Shin, D.; Switzer, C.

Two Watson\_Crick-like metallo base-pairs.

*Org. Lett.* **2008**, *10*, 1091–1094.

## Electronic Supplementary Information (ESI)

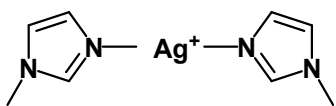

Silke Johannsen, Nicole Megger, Dominik Böhme, Roland K. O. Sigel and Jens Müller  
Solution structure of a DNA double helix with consecutive metal-mediated base pairs  
*NATURE CHEMISTRY* **2010**, *2*, 229-234.

Kristina Petrovec, Bart Jan Ravoo and Jens Müller  
Cooperative formation of silver(I)-mediated base pairs  
*Chem. Commun.*, **2012**, *48*, 11844-11846.

Sadhana Kumbhar, Silke Johannsen, Roland K.O. Sigel, Mark P. Waller, Jens Müller  
A QM/MM refinement of an experimental DNA structure with metal-mediated base pairs  
*Journal of Inorganic Biochemistry*, **2013**, *127*, 203–210.

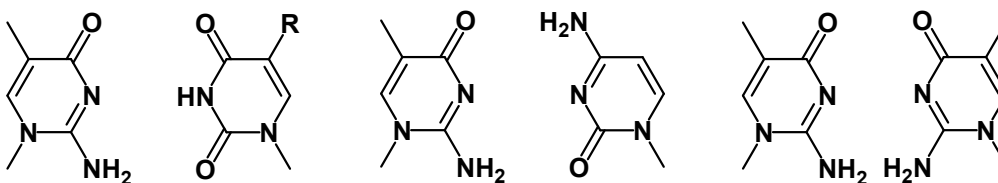

(No complex structure is indicated)

Hidehito Urata, Eriko Yamaguchi, Yasunari Nakamura and Shun-ichi Wada  
Pyrimidine–pyrimidine base pairs stabilized by silver(I) ions  
*Chem. Commun.*, **2011**, *47*, 941–943

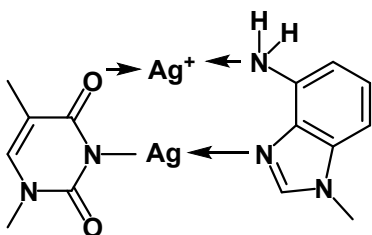

Dominik A. Megger, Célia Fonseca Guerra, Jan Hoffmann, Bernhard Brutschy, F. Matthias Bickelhaupt, and Jens Müller  
Contiguous Metal-Mediated Base Pairs Comprising Two AgI Ions  
*Chem. Eur. J.*, **2011**, *17*, 6533 – 6544.



## Electronic Supplementary Information (ESI)

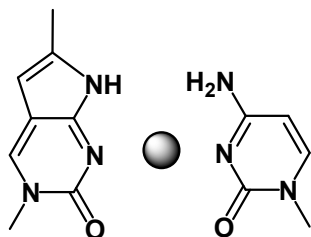

Ki Soo Park, Joon Young Lee and Hyun Gyu Park

Mismatched pyrrolo-dC-modified duplex DNA as a novel probe for sensitive detection of silver ions

*Chem. Commun.*, **2012**, 48, 4549–4551

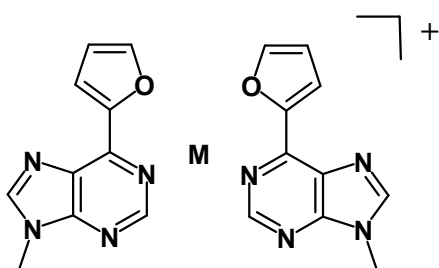

(No complex structure is indicated)

Indranil Sinha, Jutta Kösters, Alexander Hepp and Jens Müller

6-Substituted purines containing thienyl or furyl substituents as artificial nucleobases for metal-mediated base pairing

*Dalton Trans.*, **2013**, 42, 16080–16089

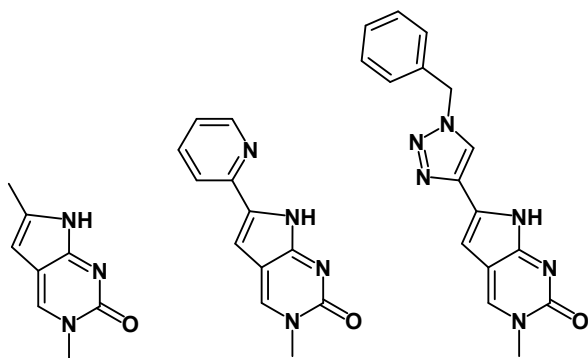

Hui Mei, Ingo Röhl, and Frank Seela

Ag<sup>+</sup>-Mediated DNA Base Pairing: Extraordinarily Stable Pyrrolo-dC–Pyrrolo-dC Pairs Binding Two Silver Ions

*J. Org. Chem.*, **2013**, 78, 9457–9463

## Electronic Supplementary Information (ESI)

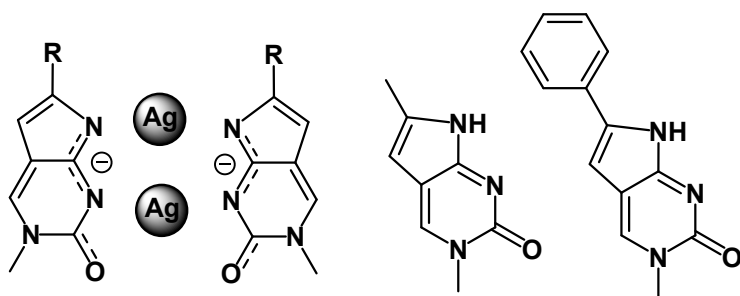

Hui Mei, Haozhe Yang, Ingo Röhl, and Frank Seela

Silver Arrays Inside DNA Duplexes Constructed from Silver(I)-Mediated Pyrrolo-dC–Pyrrolo-dC Base Pairs

*ChemPlusChem* **2014**, *79*, 914 – 918

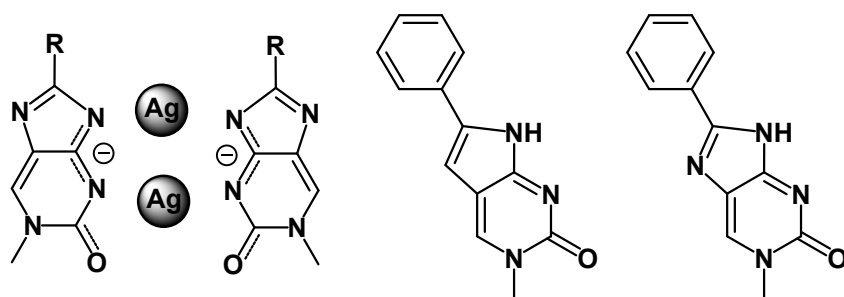

Hui Mei, Sachin A. Ingale, and Frank Seela

Imidazo-dC Metal-Mediated Base Pairs: Purine Nucleosides Capture Two Ag<sup>+</sup> Ions and Form a Duplex with the Stability of a Covalent DNA Cross-Link

*Chem. Eur. J.* **2014**, *20*, 16248 – 16257

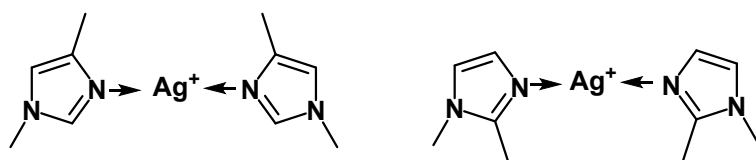

Susanne Hensel, Nicole Megger, Kristina Schweizer and Jens Müller

Second generation silver(I)-mediated imidazole base pairs

*Beilstein J. Org. Chem.* **2014**, *10*, 2139–2144

## Electronic Supplementary Information (ESI)

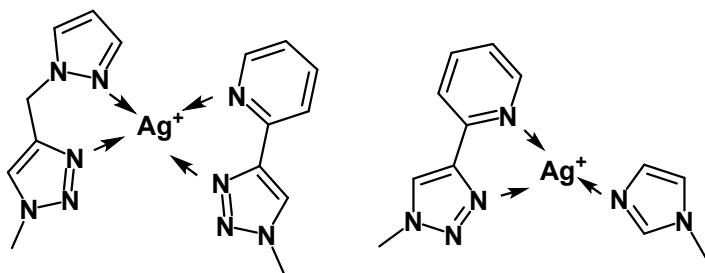

Tim Richters, Olga Krug, Jutta Kcsters, Alexander Hepp, and Jens Müller

A Family of “Click” Nucleosides for Metal-Mediated Base Pairing: Unravelling the Principles of Highly Stabilizing Metal-Mediated Base Pairs

*Chem. Eur. J.*, **2014**, *20*, 7811 – 7818

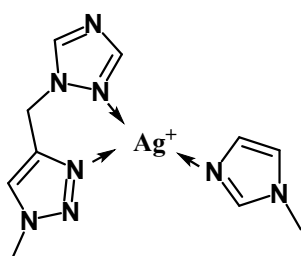

Tim Richters and Jens Müller

A Metal-Mediated Base Pair with a [2+1] Coordination Environment

*Eur. J. Inorg. Chem.* **2014**, 437–441

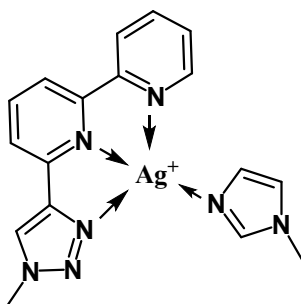

S. Litau, J. Müller

"A tridentate "click" nucleoside for metal-mediated base pairing"

*J. Inorg. Biochem.* **2015**, *148*, 116-120.

## Electronic Supplementary Information (ESI)

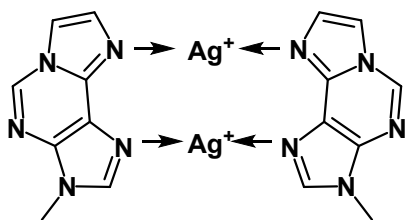

S. Mandal, A. Hepp, J. Müller

"Unprecedented dinuclear silver(I)-mediated base pair involving the DNA lesion 1,*N*<sup>6</sup>-ethenoadenine"

*Dalton Trans.* **2015**, *44*, 3540-3543

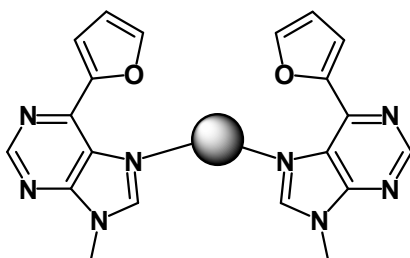

I. Sinha, C. Fonseca Guerra, J. Müller

"A Highly Stabilizing Silver(I)-Mediated Base Pair in Parallel-Stranded DNA"

*Angew. Chem. Int. Ed.* **2015**, *54*, 3603-3606.

## Electronic Supplementary Information (ESI)

Cu(II)-----

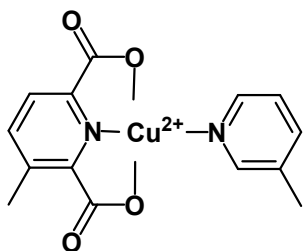

Meggers, E.; Holland, P. L.; Tolman, W. B.; Romesberg, F. E.; Schultz, P. G.

A novel copper-mediated DNA base pair.

*J. Am. Chem. Soc.* **2000**, *122*, 10714–10715.

Atwell, S.; Meggers, E.; Spraggon, G.; Schultz, P. G.

Structure of a copper-mediated base pair in DNA.

*J. Am. Chem. Soc.* **2001**, *123*, 12364–12367.

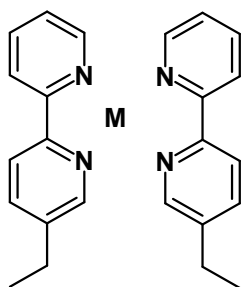

(No complex structure is indicated in the manuscript)

Haim Weizman; Yitzhak Tor

2,2'-Bipyridine Ligand: A Novel Building Block for Modifying DNA with Intra-Duplex Metal Complexes

*J. Am. Chem. Soc.* **2001**, *123*, 3375-3376

Kentaro Tanaka; Motoyuki Tasaka; Honghua Cao; Mitsuhiro Shionoya

An approach to metal-assisted DNA base pairing: novel  $\beta$ -C-nucleosides with a 2-aminophenol or a catechol as the nucleobase

*Eur. J. Pharm. Chem. Sci.*, **2001**, *13*, 77-83.

## Electronic Supplementary Information (ESI)

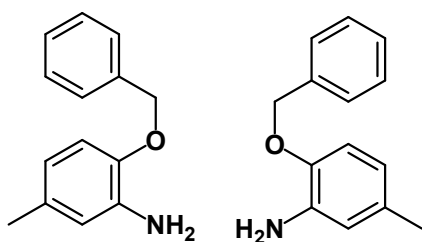

Kentaro Tanaka; Motoyuki Tasaka; Honghua Cao; Mitsuhiko Shionoya  
Toward Nano-assembly of Metals Through Engineered DNAs  
*Supramolecular Chemistry*, **2002**, *14*, 255-261.

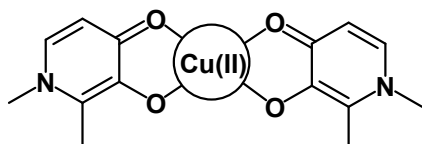

Tanaka, K.; Tengeiji, A.; Kato, T.; Toyama, N.; Shiro, M.; Shionoya, M.  
Efficient incorporation of a copper hydroxypyridone base pair in DNA.  
*J. Am. Chem. Soc.* **2002**, *124*, 12494–12498.

Kentaro Tanaka; Atsushi Tengeiji; Tatsuhisa Kato; Namiki Toyama; Mitsuhiko Shionoya  
A Discrete Self-Assembled Metal Array in Artificial DNA  
*Science*, **2003**, *299*, 1212-1213.

Kentaro Tanaka; Guido H. Clever; Yusuke Takezawa; Yasuyuki Yamada; Corinna Kaul; Mitsuhiko Shionoya; Thomas Carell  
Programmable self-assembly of metal ions inside artificial DNA duplexes  
*Nat Nanotechnol.* **2006**, *1*, 190-194

Mallajosyula, S. S.; Pati, S. K.  
Conformational tuning of magnetic interactions in metal-DNA complexes.  
*Angew. Chem., Int. Ed.* **2009**, *48*, 4977–4981.

Schlegel, M. K.; Essen, L.-O.; Meggers, E.  
Duplex structure of a minimal nucleic acid.  
*J. Am. Chem. Soc.* **2008**, *130*, 8158–8159.

## Electronic Supplementary Information (ESI)

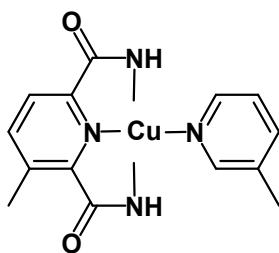

Zimmermann, N.; Meggers, E.; Schultz, P. G.

A second-generation copper(II)-mediated metallo-DNA-base pair.

*Bioorg. Chem.*, **2004**, *32*, 13–25.

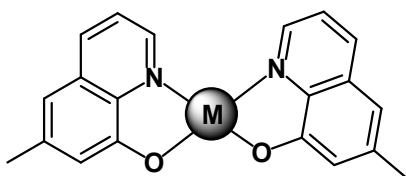

Zhang, L. L.; Meggers, E.

An extremely stable and orthogonal DNA base pair with a simplified three-carbon backbone.

*J. Am. Chem. Soc.* **2005**, *127*, 74–75.

## Electronic Supplementary Information (ESI)

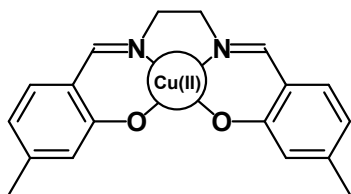

Guido H. Clever, Kurt Polborn, and Thomas Carell

A Highly DNA-Duplex-Stabilizing Metal–Salen Base Pair

*Angew. Chem. Int. Ed.*, **2005**, *44*, 7204–7208

G. H. Clever, T. Carell

Controlled Stacking of 10 Transition-Metal Ions inside a DNA Duplex

*Angew Chem Int Ed.* **2007**, *46*, 250-253.

Guido H. Clever, Stephan J. Reitmeier, Thomas Carell, and Olav Schiemann

Antiferromagnetic Coupling of Stacked CuII–Salen Complexes in DNA

*Angew. Chem. Int. Ed.*, **2010**, *49*, 4927–4929

Guido H. Clever, Yvonne Scrtl, Heather Burks, Werner Spahl, and Thomas Carell

Metal–Salen-Base-Pair Complexes Inside DNA: Complexation Overrides Sequence Information

*Chem. Eur. J.*, **2006**, *12*, 8708–8718

C. Kaul, M. Müller, M. Wagner, S. Schneider, T. Carell

Reversible bond formation enables replication and amplification of a crosslinking salen complex as an orthogonal base pair

*Nat Chem.* **2011**, *3*, 794-800.



## Electronic Supplementary Information (ESI)

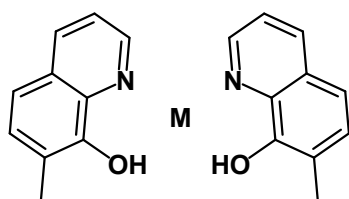

Thomas Ehrenschwender, Wolfgang Schmucker, Christian Wellner, Timo Augenstein, Patrick Carl, Jeffrey Harmer, Frank Breher, and Hans-Achim Wagenknecht

“Development of a Metal-Ion-Mediated Base Pair for Electron Transfer in DNA”

*Chem. Eur. J.*, **2013**, *19*, 12547 – 12552.

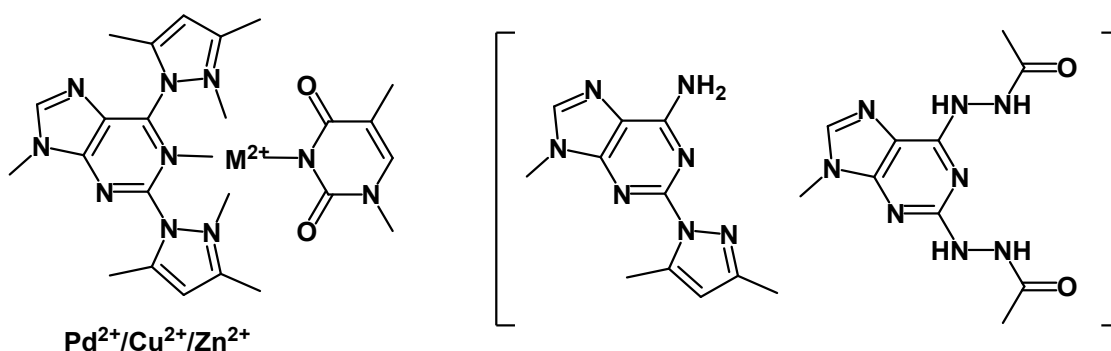

Sharmin Taherpour, Harri Lönnberg and Tuomas Lönnberg

“2,6-Bis(functionalized) purines as metal-ion-binding surrogate nucleobases that enhance hybridization with unmodified 2'-O-methyl oligoribonucleotides”

*Org. Biomol. Chem.*, **2013**, *11*, 991–1000.

S. Taherpour, O. Golubev and T. Lönnberg

“Metal-ion-mediated base pairing between natural nucleobases and bidentate 3,5-dimethylpyrazolyl-substituted purine ligands”

*J. Org. Chem.*, **2014**, *79*, 8900-8909.

## Electronic Supplementary Information (ESI)

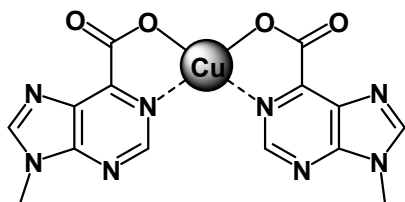

Eun-Kyong Kim and Christopher Switzer\*

Bis(6-carboxypurine)-Cu<sup>2+</sup>: A Possibly Primitive Metal-Mediated Nucleobase Pair

*Org. Lett.*, **2014**, 16, 4059–4061.

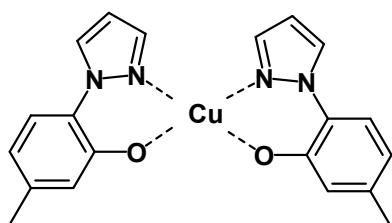

Meng Su, María Tomás-Gamasa and Thomas Carell

DNA based multi-copper ions assembly using combined pyrazole and salen ligandosides

*Chem. Sci.*, **2015**, 6, 632–638

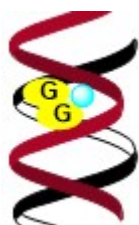

Wei Li, Xuyin Zhao, Jinli Zhang, Yan Fu

“Cu(II)-coordinated GpG-duplex DNA as peroxidase mimetics and its application for label-free detection of Cu<sup>2+</sup> ions”

*Biosensors and Bioelectronics*, **2014**, 60, 252–258.

## Electronic Supplementary Information (ESI)

Hg(II)-----

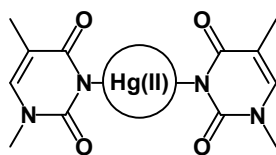

Sidney Katz

“The reversible reaction of Hg(II) and double-stranded polynucleotides. A step-function theory and its significance”

*Biocimica et Biophysica Acta*, **1963**, 68, 240-253.

Linda D. Kosturko, Cynthia Folzer, Robert F. Stewart

“The crystal and molecular structure of a 2:1 complex of 1-methylthymine-mercury(II)”

*Biochemistry*, **1974**, 19, 3949-3951.

Zsuzsanna Kuklenyik & Luigi G. Marzilli

“Mercury(II) site-selective binding to a DNA hairpin. Relationship of sequence-dependent intra- and interstrand cross-linking to the hairpin-duplex conformational transition”

*Inorg. Chem.*, **1996**, 35, 5654-5662.

Akira Ono and Humika Togashi.

“Novel Highly Selective Mercury Sensing in Aqueous Solutions: Fluorescence Resonance Energy Transfer associated with Hairpin Structure Formation of Oligonucleotide Derivatives derived by Mercury-Mediated Thymine-Hg-Thymine Pair Formation”

*Angew. Chem. Int. Ed.*, **2004**, 43, 4300-4302.

Yoko Miyake, Humika Togashi, Mitsuru Tashiro, Hiroshi Yamaguchi, Shuji Oda, Megumi Kudo, Yoshiyuki Tanaka, Yoshinori Kondo, Ryuichi Sawa, Takashi Fujimoto, Tomoya Machinami, Akira Ono

“Mercury<sup>II</sup>-mediated formation of thymine-HgII-thymine base pairs in DNA duplexes” *J. Am. Chem. Soc.*, **2006**, 128, 2172-2173.

Yoshiyuki Tanaka, Hiroshi Yamaguchi, Shuji Oda, Makoto Nomura, Chojiro Kojima, Yoshinori Kondo, Akira Ono

“NMR spectroscopic study of a DNA duplex with mercury-mediated T-T base pairs” *Nucleoside Nucleotides & Nucleic Acids*, **2006**, 25, 613-624.

Kentaro Tanaka; Guido H. Clever; Yusuke Takezawa; Yasuyuki Yamada; Corinna Kaul; Mitsuhiko

## Electronic Supplementary Information (ESI)

Shionoya; Thomas Carell

Programmable self-assembly of metal ions inside artificial DNA duplexes

*Nat Nanotechnol.* **2006**, *1*, 190-194

Yoshiyuki Tanaka, Shuji Oda, Hiroshi Yamaguchi, Yoshinori Kondo, Chojiro Kojima and Akira Ono

“<sup>15</sup>N-<sup>15</sup>N *J*-coupling across HgII: Direct observation of Hg<sup>II</sup>-mediated T-T base pairs in a DNA duplex” *J. Am. Chem. Soc.*, **2007**, *129*, 244-245.

Hidetaka Torigoe, Akira Ono, and Tetsuo Kozasa

“Hg(II) Ion Specifically Binds with T:T Mismatched Base Pair in Duplex DNA”

*Chem. Eur. J.*, **2010**, *16*, 13218-13225.

Urata, H.; Yamaguchi, E.; Funai, T.; Matsumura, Y.; Wada, S.

Incorporation of thymine nucleotides by DNA polymerases through T-Hg<sup>II</sup>-T base pairing.

*Angew. Chem., Int. Ed.* **2010**, *49*, 6516–6519.

J. Kondo, T. Yamada, C. Hirose, I. Okamoto, Y. Tanaka, A. Ono,

“Crystal structure of metallo-DNA duplex containing consecutive Watson-Crick-like T-Hg(II)-T base pairs”

*Angew. Chem. Int. Ed.*, **2014**, *53*, 2385-2388.

H. Yamaguchi, J. Šebera, J. Kondo, S. Oda, T. Komuro, T. Kawamura, T. Dairaku, Y. Kondo, I. Okamoto, A. Ono, J. V. Burda, C. Kojima, V. Sychrovský and Y. Tanaka,

“The structure of metallo-DNA with consecutive thymine–Hg<sup>II</sup>–thymine base pairs explains positive entropy for the metallo base pair formation”

*Nucleic Acids Research*, **2014**, *42*, 4094-4099.

Takenori Dairaku, Kyoko Furuita, Hajime Sato, Jakub Šebera, Daichi Yamanaka, Hiroyuki Otaki, Shoko Kikkawa, Yoshinori Kondo, Ritsuko Katahira, F. Matthias Bickelhaupt, Célia Fonseca Guerra, Akira Ono, Vladimír Sychrovský, Chojiro Kojima, and Yoshiyuki Tanaka

“Direct detection of the mercury-nitrogen bond in the thymine-Hg<sup>II</sup>-thymine base-pair with <sup>199</sup>Hg NMR spectroscopy”

*Chem. Comm.*, 2015, *51*, 8488-8491.

## Electronic Supplementary Information (ESI)

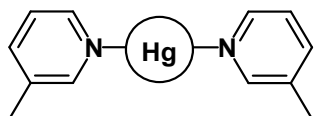

Kentaro Tanaka; Guido H. Clever; Yusuke Takezawa; Yasuyuki Yamada; Corinna Kaul; Mitsuhiko Shionoya; Thomas Carell

Programmable self-assembly of metal ions inside artificial DNA duplexes

*Nat Nanotechnol.* **2006**, *1*, 190-194

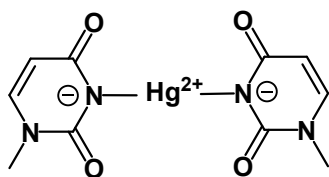

Silke Johannsen, Susann Paulus, Nicole Düpre, Jens Müller, Roland K.O. Sigel

“Using in vitro transcription to construct scaffolds for one-dimensional arrays of mercuric ions”

*Journal of Inorganic Biochemistry*, **2008**, *102*, 1141–1151.

Kozasa, T., Miyakawa, Y., Ono, A., Torigoe, H.

“The specific interaction between metal cation and mismatch base pair in duplex RNA”

*Nucleic Acids Symp. Ser.* **2008**, *52*, 197-198.

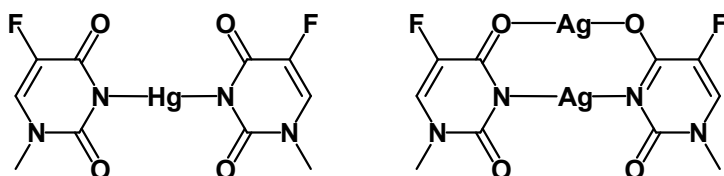

Itaru Okamoto, Kenji Iwamoto, Yuko Watanabe, Yoko Miyake, Akira Ono

“Switching Metal Ion Binding Selectivity of Chemically Modified Uracil Pairs in DNA Duplexes Triggered by pH Change”

*Angew. Chem. Int. Ed.*, **2009**, *48*, 1658-1651.

## Electronic Supplementary Information (ESI)

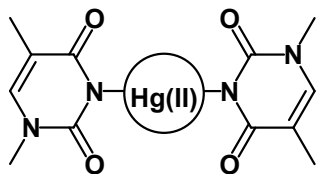

T. Ono, K. Yoshida, Y. Saotome, R. Sakabe, I. Okamoto, A. Ono

“Synthesis of covalently linked parallel and antiparallel DNA duplexes containing the metal-mediated base pairs T-Hg(II)-T and C-Ag(I)-C”

*Chem. Commun.*, **2011**, 47, 1542-1544.

## Electronic Supplementary Information (ESI)

### Other metal ions-----

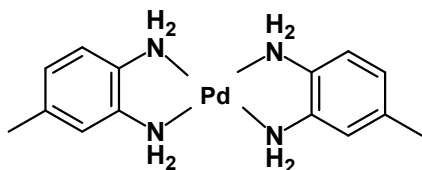

Tanaka, K.; Shionoya, M.

Synthesis of a novel nucleoside for alternative DNA base pairing through metal complexation.

*J. Org. Chem.* **1999**, *64*, 5002–5003.

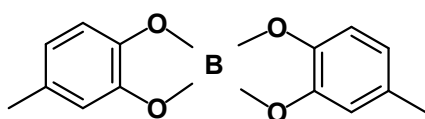

H. Cao, K. Tanaka, M. Shionoya,.

An alternative base-pairing of catechol-bearing nucleosides by borate formation

*Chem. Pharm. Bull.*, **2000**, *48*, 1745-1748

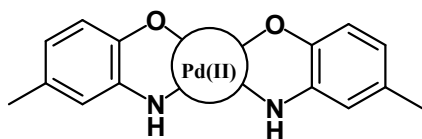

Motoyuki Tasaka, Kentaro Tanaka, Motoo Shiro & Mitsuhiro Shionoya

A Palladium-mediated DNA Base Pair of a  $\beta$ -C-Nucleoside Possessing a 2-Aminophenol as the Nucleobase

*Supramol. Chem.*, **2001**, *13*, 671-675

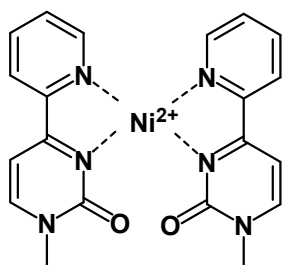

C. Switzer, D. Shin,

A pyrimidine-like nickel(II) DNA base pair

*Chem. Commun.* **2005**, 1342-1344

## Electronic Supplementary Information (ESI)

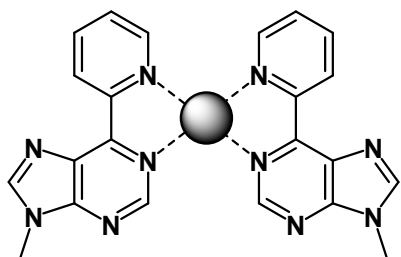

C. Switzer, S. Sinha, P.H. Kim, B.D. Heuberger,

A Purine-like Nickel(II) Base Pair for DNA

*Angew. Chem. Int. Ed.* **2005**, *44*, 1529-1532

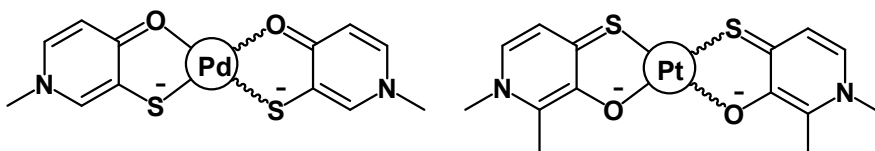

Takezawa, Y.; Tanaka, K.; Yori, M.; Tashiro, S.; Shiro, M.; Shionoya, M.

Softmetal-mediated base pairing with novel synthetic nucleosides possessing an O,S-donor ligand.

*J. Org. Chem.* **2008**, *73*, 6092–6098.

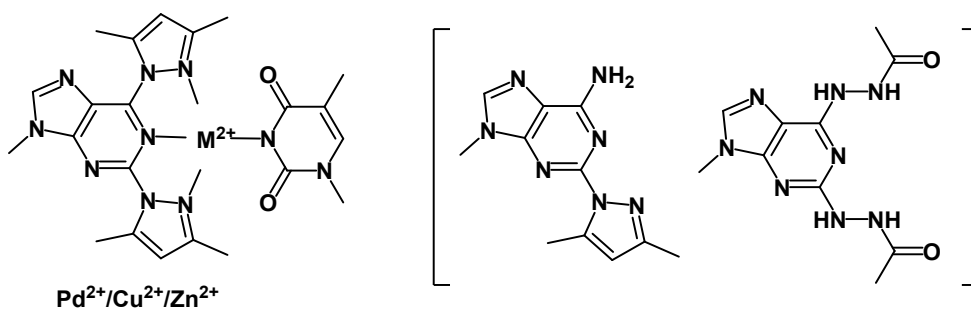

Sharmin Taherpour, Harri Lönnberg and Tuomas Lönnberg

2,6-Bis(functionalized) purines as metal-ion-binding surrogate nucleobases that enhance hybridization with unmodified 2'-O-methyl oligoribonucleotides

*Org. Biomol. Chem.*, **2013**, *11*, 991–1000

S. Taherpour, O. Golubev and T. Lönnberg

“Metal-ion-mediated base pairing between natural nucleobases and bidentate 3,5-dimethylpyrazolyl-substituted purine ligands”

*J. Org. Chem.*, **2014**, *79*, 8900-8909.



## Electronic Supplementary Information (ESI)

### Metallo-base-pairs in parallel duplexes-----

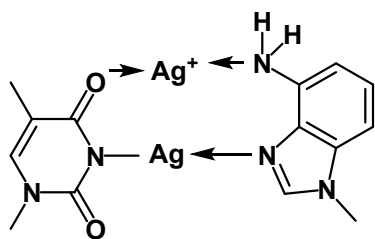

Dominik A. Megger, Célia Fonseca Guerra, Jan Hoffmann, Bernhard Brutschy, F. Matthias Bickelhaupt, and Jens Müller

Contiguous Metal-Mediated Base Pairs Comprising Two AgI Ions

*Chem. Eur. J.*, **2011**, *17*, 6533 – 6544.

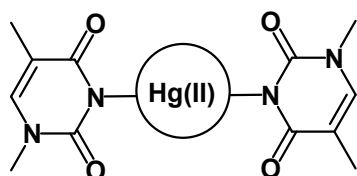

T. Ono, K. Yoshida, Y. Saotome, R. Sakabe, I. Okamoto, A. Ono\*

“Synthesis of covalently linked parallel and antiparallel DNA duplexes containing the metal-mediated base pairs T-Hg(II)-T and C-Ag(I)-C” *Chem. Commun.*, **2011**, *47*, 1542-1544.

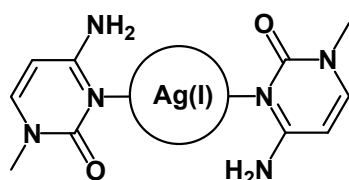

T. Ono, K. Yoshida, Y. Saotome, R. Sakabe, I. Okamoto, A. Ono\*

“Synthesis of covalently linked parallel and antiparallel DNA duplexes containing the metal-mediated base pairs T-Hg(II)-T and C-Ag(I)-C” *Chem. Commun.*, (2011), *47* (5), 1542-1544.

D. A. Megger and J. Müller,

Silver(I)-Mediated Cytosine Self-Pairing is Preferred Over Hoogsteen-Type Base Pairs with the Artificial Nucleobase 1,3-Dideaza-6-Nitropurine

*Nucleosides, Nucleotides Nucleic Acids*, 2010, *29*, 27–38;

## Electronic Supplementary Information (ESI)

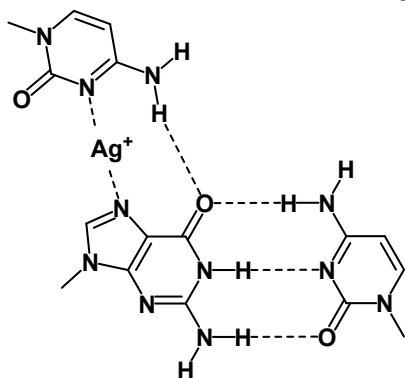

Toshihiro Ihara, Tatsuaki Ishii, Norie Araki, Anthony W. Wilson, and Akinori Jyo  
Silver Ion Unusually Stabilizes the Structure of a Parallel-Motif DNA Triplex  
*J. AM. CHEM. SOC.* **2009**, *131*, 3826–3827

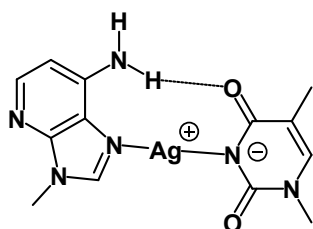

Fabian-Alexander Polonius and Jens Müller  
An Artificial Base Pair, Mediated by Hydrogen Bonding and Metal-Ion Binding  
*Angew. Chem. Int. Ed.* **2007**, *46*, 5602–5604

Dominik A. Megger, Célia Fonseca Guerra, F. Matthias Bickelhaupt, Jens Müller  
Silver(I)-mediated Hoogsteen-type base pairs  
*Journal of Inorganic Biochemistry*, **2011**, *105*, 1398–1404

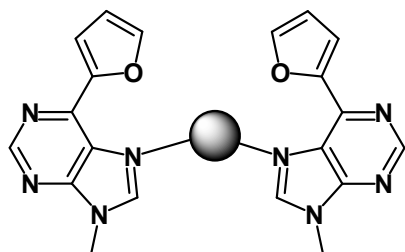

I. Sinha, C. Fonseca Guerra, J. Müller

"A Highly Stabilizing Silver(I)-Mediated Base Pair in Parallel-Stranded DNA"

*Angew. Chem. Int. Ed.* **2015**, *54*, 3603-3606.

## Electronic Supplementary Information (ESI)

### Metallo-base pairs containing plural metal ions-----

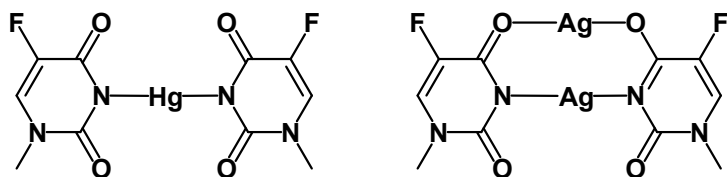

Itaru Okamoto, Kenji Iwamoto, Yuko Watanabe, Yoko Miyake, Akira Ono

“Switching Metal Ion Binding Selectivity of Chemically Modified Uracil Pairs in DNA Duplexes Triggered by pH Change”

*Angew. Chem. Int. Ed.*, **2009**, *48*, 1658-1651.

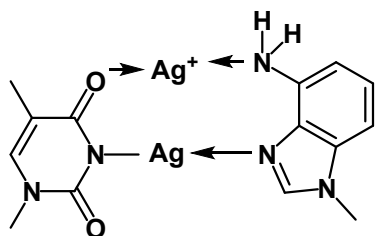

Dominik A. Megger, Célia Fonseca Guerra, Jan Hoffmann, Bernhard Brutschy, F. Matthias Bickelhaupt, and Jens Müller

Contiguous Metal-Mediated Base Pairs Comprising Two AgI Ions

*Chem. Eur. J.*, **2011**, *17*, 6533 – 6544.

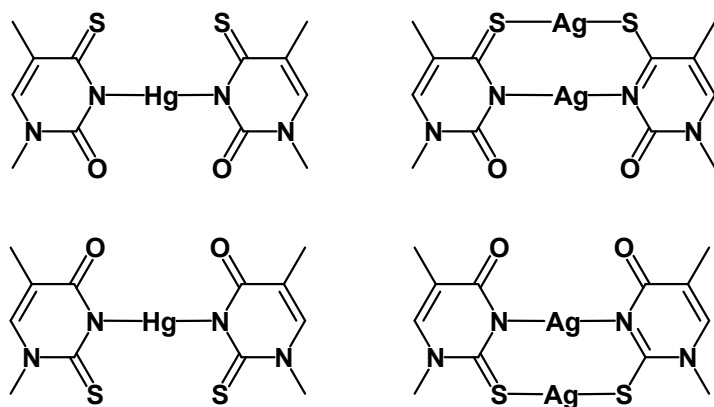

Itaru Okamoto, Takashi Ono, Rimi Sameshima and Akira Ono

“Metal ion-binding properties of DNA duplexes containing thiopyrimidine base pairs”

*Chem. Commun.*, **2012**, *48*, 4347-4349.

## Electronic Supplementary Information (ESI)

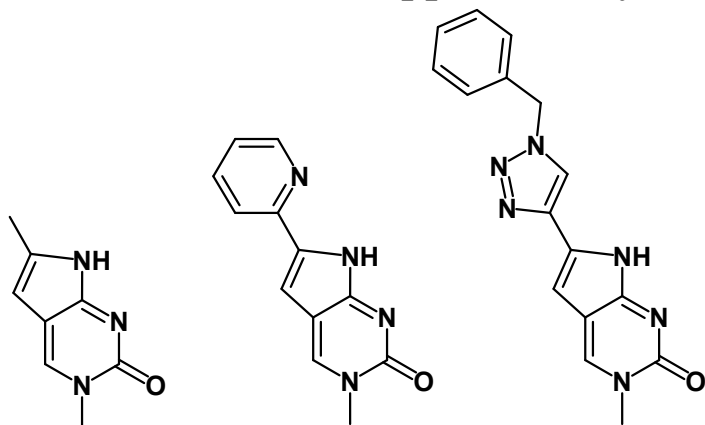

Hui Mei, Ingo Röhl, and Frank Seela

Ag<sup>+</sup>-Mediated DNA Base Pairing: Extraordinarily Stable Pyrrolo-dC–Pyrrolo-dC Pairs Binding Two Silver Ions

*J. Org. Chem.*, **2013**, *78*, 9457–9463

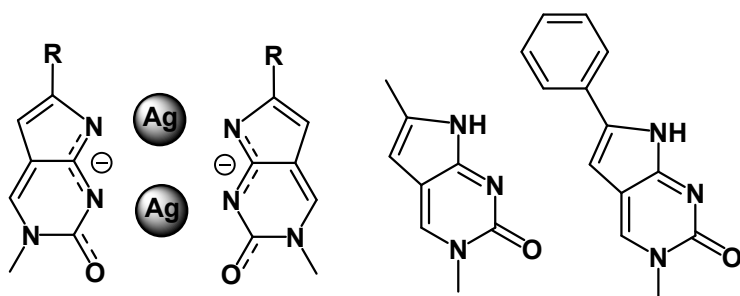

Hui Mei, Haozhe Yang, Ingo Röhl, and Frank Seela

Silver Arrays Inside DNA Duplexes Constructed from Silver(I)-Mediated Pyrrolo-dC–Pyrrolo-dC Base Pairs

*ChemPlusChem* **2014**, *79*, 914 – 918

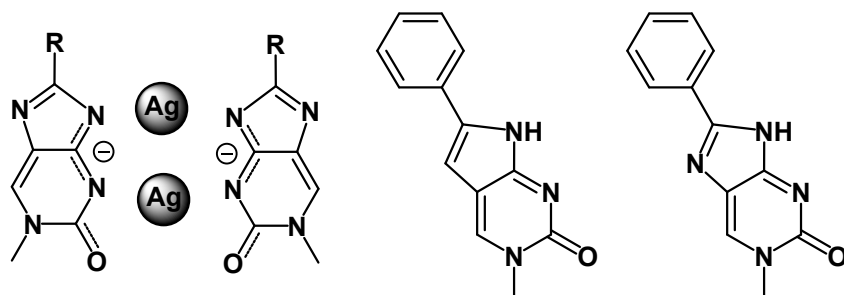

Hui Mei, Sachin A. Ingale, and Frank Seela

Imidazo-dC Metal-Mediated Base Pairs: Purine Nucleosides Capture Two Ag<sup>+</sup> Ions and Form a

# Electronic Supplementary Information (ESI)

Duplex with the Stability of a Covalent DNA Cross-Link

*Chem. Eur. J.* **2014**, *20*, 16248 – 16257

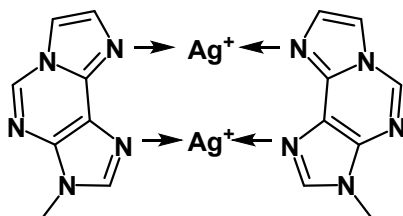

S. Mandal, A. Hepp, J. Müller

"Unprecedented dinuclear silver(I)-mediated base pair involving the DNA lesion 1,*N*<sup>6</sup>-ethenoadenine"

*Dalton Trans.* **2015**, *44*, 3540-3543
